# Supplementary material for: Optical induction of autophagy via Transcription factor EB (TFEB) reduces pathological tau in neurons
Source: PubMed Central journal article supplement (PMC7092971; doi:10.1371/journal.pone.0230026), 2020-03-24
Supplement: pone.0230026.s001.pdf [file pone.0230026.s001.pdf]

# FIGURE 2A

|             |   |   |   |   |   |   |   |   |   |
|-------------|---|---|---|---|---|---|---|---|---|
| WT - 0N3R   | - | + | + | - | - | - | - | - | - |
| T231D/S235D | - | - | - | + | + | - | - | - | - |
| P301L       | - | - | - | - | - | + | + | - | - |
| WT - 0N4R   | - | - | - | - | - | - | - | + | + |
| TFEB-GFP    | - | - | + | - | + | - | + | - | + |

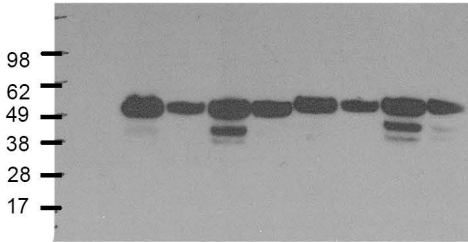

←  
**Tau12**

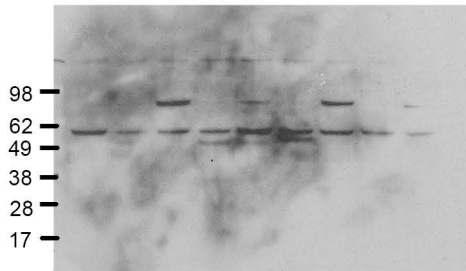

←  
**GFP**

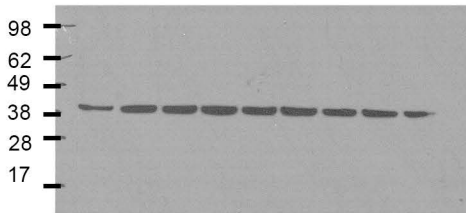

←  
**GAPDH**

|             |   |   |   |   |   |   |   |   |   |
|-------------|---|---|---|---|---|---|---|---|---|
| WT - 0N3R   | - | + | + | - | - | - | - | - | - |
| T231D/S235D | - | - | - | + | + | - | - | - | - |
| P301L       | - | - | - | - | - | + | + | - | - |
| WT - 0N4R   | - | - | - | - | - | - | - | + | + |
| TFEB-GFP    | - | - | + | - | + | - | + | - | + |
