# Supplementary material for: Optical induction of autophagy via Transcription factor EB (TFEB) reduces pathological tau in neurons
Source: PubMed Central journal article supplement (PMC7092971; doi:10.1371/journal.pone.0230026), 2020-03-24
Supplement: pone.0230026.s002.pdf [file pone.0230026.s002.pdf]

# FIGURE 2B

|                        |   |   |   |   |   |   |
|------------------------|---|---|---|---|---|---|
| pCMV-0N3R(T231D/S235D) | - | + | + | + | + | + |
| pCMV-TFEB3xFLAG        | - | - | + | - | - | - |
| pCMV-TFEB-GFP          | - | - | - | + | - | - |
| pCMV-TFEB(S211A)-GFP   | - | - | - | - | + | - |
| pCMV-Empty             | - | - | - | - | - | + |

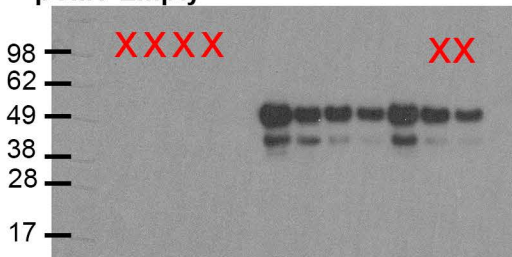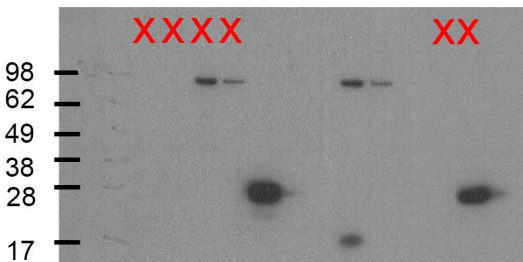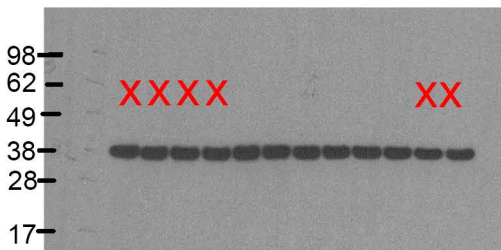

|                        |   |   |   |   |   |   |
|------------------------|---|---|---|---|---|---|
| pCMV-0N3R(T231D/S235D) | - | + | + | + | + | + |
| pCMV-TFEB3xFLAG        | - | - | + | - | - | - |
| pCMV-TFEB-GFP          | - | - | - | + | - | - |
| pCMV-TFEB(S211A)-GFP   | - | - | - | - | + | - |
| pCMV-Empty             | - | - | - | - | - | + |

←  
**Tau12**

←  
**GFP**

←  
**GAPDH**
