# Supplementary material for: Optical induction of autophagy via Transcription factor EB (TFEB) reduces pathological tau in neurons
Source: PubMed Central journal article supplement (PMC7092971; doi:10.1371/journal.pone.0230026), 2020-03-24
Supplement: pone.0230026.s003.pdf [file pone.0230026.s003.pdf]

**FIGURE 4A** Imagined through ChemiDoc

|               |   |   |   |   |   |   |   |   |
|---------------|---|---|---|---|---|---|---|---|
| T231D/S235D   | + | + | + | + | + | + | + | + |
| pCMV-TFEB     | - | + | - | - | - | - | - | - |
| pCMV-LAP      | - | - | + | + | + | - | - | - |
| LRE-TFEB lone | - | - | + | + | + | + | + | + |
| LIGHT         | + | + | + | + | + | - | - | - |

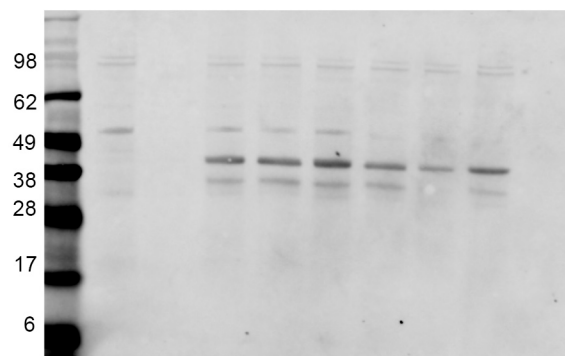

← VP16

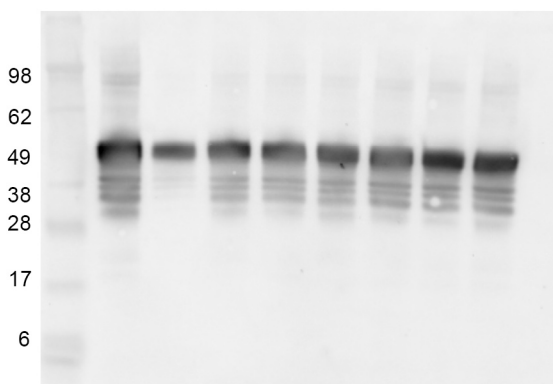

← Tau12

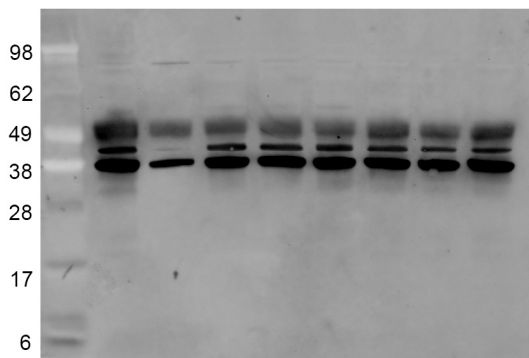

← GFP

← GAPDH

|               |   |   |   |   |   |   |   |   |
|---------------|---|---|---|---|---|---|---|---|
| T231D/S235D   | + | + | + | + | + | + | + | + |
| pCMV-TFEB     | - | + | - | - | - | - | - | - |
| pCMV-LAP      | - | - | + | + | + | - | - | - |
| LRE-TFEB lone | - | - | + | + | + | + | + | + |
| LIGHT         | + | + | + | + | + | - | - | - |
