# Supplementary material for: Optical induction of autophagy via Transcription factor EB (TFEB) reduces pathological tau in neurons
Source: PubMed Central journal article supplement (PMC7092971; doi:10.1371/journal.pone.0230026), 2020-03-24

**FIGURE 5D** Imaged through ChemiDoc

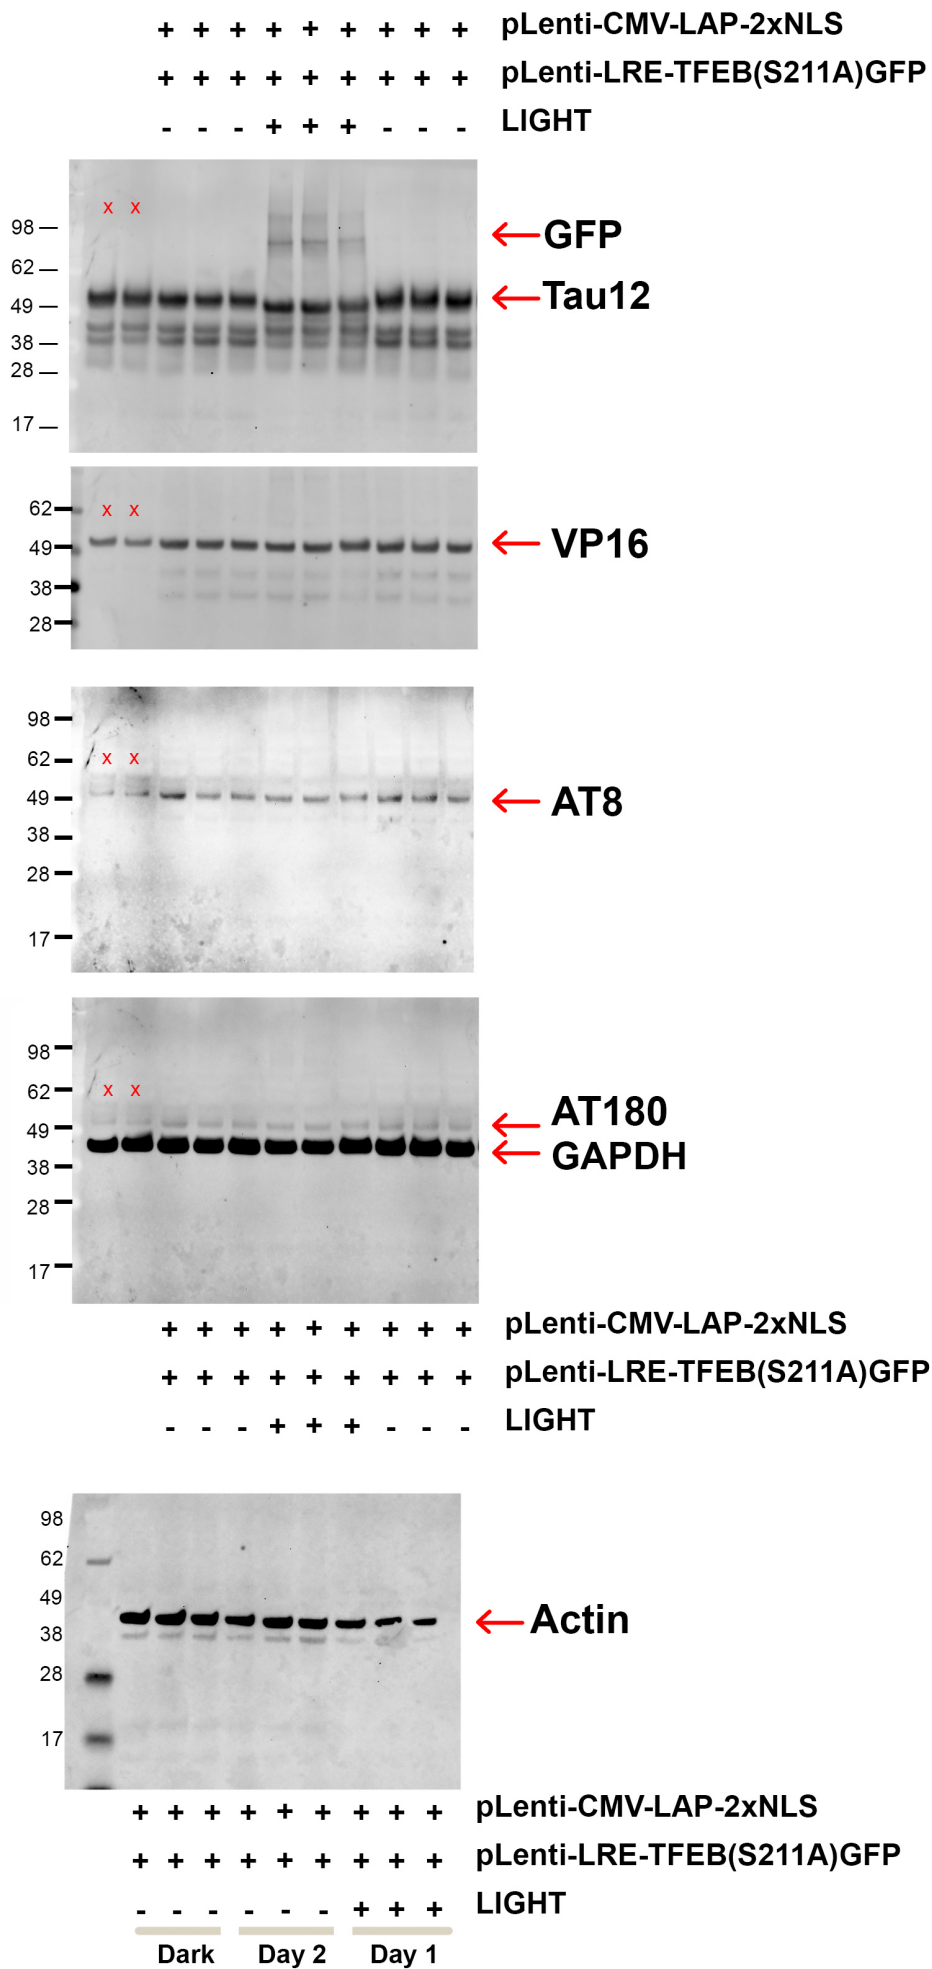

Supplement: pone.0230026.s004.pdf [file pone.0230026.s004.pdf]
